# Supplementary material for: Gene Expression and Epigenetic Modification of Aromatase during Sex Reversal and Gonadal Development in Blotched Snakehead (Channa maculata)
Source: MDPI journal article supplement (doi:10.3390/fishes8030129), 2023-02-24

### Supplementary Materials:

**Figure S1.** The nucleotide, deduced amino acid, and the promoter sequences of *cyp19a1a* (**a-b**) and *cyp19a1b* (**c-d**). (**a, c**) The nucleotide and amino acid sequences are numbered on the left. The start codon and stop codon are in red bold, the mRNA instability (ATTTA) is displayed as wavy line, and poly-adenylation signal sequence (AATAA) is underlined with underscore. The signal peptide is highlighted with blue background, and the conserved P450 domain are showed with gray background; (**b, d**) The putative TSS is marked in bold, and designated as +1, the putative TFBS are highlighted with different symbols, and the putative CpG islands are yellow-shaded and the CpG sites are in the box.

**Figure S2.** The alignment of amino acid sequences of *cyp19a1a* and *cyp19a1b* in *C. maculata*. The dark shade indicates 100% identity.

**Figure S3.** The alignments of amino acid sequences of aromatase protein sequences from 26 species. The dark shade indicates 100% identity.

**Figure S4.** The relationship between the CpG methylation levels and the expression levels of aromatase gene in the gonads of XX-F and XY-M individuals at different developmental stages. (**a**) *cyp19a1a* in ovary; (**b**) *cyp19a1b* in ovary; (**c**) *cyp19a1a* in testis; (**d**) *cyp19a1b* in testis.

Figure S1

(a)

1 M D L I P A C E R A M T  
1 attgcttgttgggtctctgaagtcgtgtgcagattgtgtcaagtcctccctcct**ATGG**GATCTGATCCTTGTGTGAACGGGCCATGACT  
13 P V G L K A I E A D L V S V S L N T T T V E S P G I S I A T  
91 CCTGTAGGTTTGAAGCTATAGAAGCAGACCTGGTCTCTGTTTCTTTGAACACCACTACGGTTGAGTCACCAAGGCATTTCCATAGCAACC  
43 R T L I L L V C L L L F A W S H T D K N N V P G P S F C L G  
181 CGGACACTGATACTGCTTGTGTGTCTGCTGCTGCTTCGCCCTGGAGCCACACAGACAAGAACAATGTTCCAGGTCCTTCCTTTTGTCTGGGT  
73 L G P I L S Y V R F M W T G I G T A S N Y Y N N K Y G D I V  
271 TTGGGGCCAATTCTGTCATATGTGAGATTCATGTGGACTGGTATAGGCACCTGCCAGCACTACTACAACAACAAGTACGGAGATATTGTC  
103 R V W I N G E E T L V I S R S S A V H H V L K N G Q Y T C R  
361 AGAGTCTGGATCAATGGAGAGGAGACCCTCGTAATCAGCAGATCGTCAGCAGTGCACCATGTACTGAAAAATGGACAATACACTTGCCGT  
133 F G S K Q G L S C I G M N E R G I I F N N N V V L W K K I R  
451 TTTGGGAGCAAAACAGGGACTCAGCTGCATTGGCATGAATGAGAGAGGCATCATATTTAACAACAATGTAGTCTGTGTGAAAAAATACGC  
163 T Y F T K A L T G P G L Q Q T V E V C V S S M Q T H L D K L  
541 ACCTATTACCAAGACATCAGAGTCCGGGGTGCAGCAGACAGTGAAGTCTGTGCTCCTCCATGCAAGTCCAGGAGAGTCCAGGAGT  
193 G S L N H A D V L S L R C T V I D I S N R L F L G V P V D  
631 GGCAGTTTGAATCATGCGGATGTCTTAGTTTGTGCGCTGCACCGTGATCGACATCTCCAACAGACTCTTCTGGGCGTACCTGTCTGAT  
223 E K E L L M K I Q K Y F E T W Q N V L I K P D I Y F K C D W  
721 GAGAAAGAGTGTCTGATGAAGATTGAGAAGTATTTTGAACATGGCAGAAATGTGTGATCAAACAGACATCTACTCAAGTGTGACTGG  
253 I Q Q R H R K T A Q E L Q D A I E S L V E Q K R R E M G Q A  
811 ATTCACAAAGGCAGAGAACTGCCAGGAGCTGCAGGATGCCATAGAGAGCCTGTAGAACAGAGAAGAGAAATGGGGCAGGCT  
283 D K L D N I N F T A E L I F A Q N H S E L S A E D V R Q C V  
901 GATAAACTGGACAACATCAACTTTACCGCTGAGCTGATATTTGCACAGAACCACAGCAGCTGTCTGCTGAGGATGTGAGGCAGTGTGTG  
313 L E M V I A A P D T L S I S L Y F M L L L L K Q N P D V E I  
991 TTGGAGATGGTGATTGCAGCACCAGGACACTCTGTCCATCAGCCTCTATTTTATGCTGCTGCTTCTCAAACAGAATCCAGATGTGGAGTTG  
343 Q L L Q E I D T V V G Q R Q L Q N E H L Q R L Q M L E S F I  
1081 CAGTTGTCACAGGATAGACACAGTTGTAGGTCAGAGACAACCTTCAGAGGTTGCAGATGCTGGAGAGCTTCATC  
373 N E C L R F H P V V D I T M R R A L S D D I I D G Y R V P K  
1171 AATGAATGCTTGCCTTCCACCCTGTGGTGGACATCACCATGCGCCGAGCCCTGTCTGATGACATCATAGATGGCTACAGGTTCCAAAA  
403 G T N I I L N T G R M H R T E F F L K Q N E F S L E N F E K  
1261 GGCACAAATATCATCTCAATACTGGCCGAATGCACCGGACAGAGTTTTTCTCAACAAAAATGAATTCAGTCTGGAGAAGTTTGAAAAA  
433 N T P R R Y F Q P F G S G P R S C V G K H I A M V M M K S I  
1351 AATACCCCTCGTCTGTTACTTCCAGCCATTGCGTTCCAGGCCCGGATCCTGTGTTGGCAAGCATATGCCATGCTGATGAATTCGATC  
463 L V T L L S R Y S V C L H K G L T L D C L P Q T N N L S Q Q  
1441 CTGGTGACATTGCTCTCCCGGTACTCAGTTTGCCTCCATAAGGGTTTGACCTGGACTGCCTCCACAGACAAACACCTCTCCAGCAG  
493 P V E H H Q E A E H L S M R F L P R Q R G S E S T \*  
1531 CCTGTAGAGCATCACCAGGAGGCTGAACACCTCAGCATGAGATTCTTACCAGACAGAGAGGTAGCGAGTCCACA**TAG**tgagatactgac  
1621 cttatgttgcattctatacatattatgcaaaggacatccattataatctccattactacatctttcattattgttaagctaaactaaagttt  
1711 catatttttgtgtattcaataaataatgtgtacgatgaaatgtacgtttcagacatcctaataactaaagcaaatgttaattttgttgcca  
1801 atattgtgttttgttgccttcatttggatgttttgaaatgtaatggtttcagactaagaacatcttttattttacatgtaagaactgggt  
1891 atcagtgtaaaaatccctttttctgtttatattttaaactggtttttcattttttaaacaatgttcaaattatatgcttttttcattaccatt  
1981 agcagcatgaaagacataaataaagtgtattttttataaataaaagcgaaaaataaaaaaaaaaaaaaaaaaaaaa

(b)

-1019 tgcgcacagtcaggcatttcaccagtgacattcttggattcgaactgtggcggtgagtgattcacagagtttccctttatacagaattta  
DMRT  
-909 ttaataaatggaaacaaggcagagcacagtgagcactctgtcacatacaaaaaatagactaaacacaccttaggagtttggataaaat  
SOX  
-819 gtgtctgtcacacaaaagggtccacagatgaaatctgaaattatataatattacattttatataataatagaaaaatagtttcaatgggtct  
GATA  
-709 ttcaaatatcaactgctcttcaggtaatgtgtggtgttttagtggtacagtacagtcaccacacaccacagagaaaaacgcaacggctgcca  
-619 ctgatgtgcatacagatatttttggctcgtaaaattttgttgaggaaatctaaagatggcagtagctctgctctccatctactggttag  
SOX  
-509 tctgatggaggaaattcaaaatgatcatcaaagtaaacttttaaagggttgaatgggtgttgcgtgatcaattattttaaaaatacag  
DMRT  
-419 caaaaaatgttcactttgtcttgttttatataaagaaaaatgaaggaaaaacaggagtgtaagaatggagaatttaattctatttggacaga  
GATA  
-309 taaagctaataaataaataaacaacaatttttcccttgctttcacagaccaggtgctctattgtagagatttccagcgcagttcttttgg  
-219 atgttgaaaggaggatttatacttgctcatatcaccaaaacgtgcaatacactaaattaaatcccatctccttcaagagtgaggcaca  
CRE SOX  
-129 acctaactctcaagggttacaagagtattgttttacaattttcccccctctgttggcttttgcctttaccctgacctggctcgttaaccagc  
SOX FOXL  
-39 gctgactgcctataaagagaaaaagcctcactgcatcgggttgattgcttgttgggtctctgaagtccgtgtgcagattgtgtcaagtctcc  
TATA Box +1  
51 ctccct**ATGG**GATCTGATCTCTGCTTGTGAACGGGCCATGACTCCTGTAGGTTTGAAGCTATAGAAGCAGACCTGGTCTCTGTTTCTTTG  
141 AACACCACTA**CG**GTTGAGTCACCAAGGCATTTCCATAGCAACC**CG**GACACTGATACTGCTGTTTGTCTGCTGCTGTT**CG**CCTGGAGCCAC  
231 ACAGACAAGAAACAATGTTCAGgtaggatttagtggaacatttgagattttttcttctgtgttgatgccaagtattttactattttatgt  
SOX SOX

(c)

```
1 cttaaccaaggatttataaaatcgtgaatcagtgcaatttcttttagttggagaataccgatcatctttacaacaagtggaggaagcgctcg
91 tgttcttctcaaactgcgccctaagctgtcaggagtagtaacacacagaagcaagggttgactggttgactggtgagagacacttt
181 atgagcacaagcaaaaggttcatttacagacagacagcaggagtagcgagctggctcaggtgtgtgtgtactcggctggagtataaaggg
1 M V G D T V T A I L L L L L L L L L L L L
271 aatcctgtccctggggaagcacaccatcggtcccATGGTGGGTGATACAGTCACTGCGATTCTGCTTCTTCTGCTGCTGCTGCTGCTGCT
20 L F T T W S R R N R S H I P G P R F L A G L G P Y L S Y A R
361 GCTGTTTACCACCTGGAGCAGAAGAAACCGCTCACATATACCAGGTCTCGTTTCTAGCAGGACTGGTCTTATCTCTCCTATGCCAG
50 F I W T G I G T A S N Y Y S N K Y G S V V R V W I N G E E T
451 ATTTATCTGGACTGGGATTGGAACAGCAAGCAACTACTACAGCAACAAATATGGCAGTGTGTCCGGGTCTGGATTAATGGCGAGGAGAC
80 L I L S R S S A V Y H V L R S A Q Y T A R F G S K K G L E C
541 CCTAATTCTGAGCAGGTCTCTGCACTGTACCATTGTTTGGAGGAGTCCCACTACACGGCCAGATTGGGAGTAAAAAGGGGCTGGAGTG
110 I G M E G A R G I I F N S D V P L W K K V R A Y F S K A L T T G
631 TATTGGGATGGAAGGAAGGGGTATCATTTTCAACAGTGATGTTTCTCTATGGAAAAAGTCAGAGCATATTCTCCAAAGCTCTGACAGG
140 P G L Q R T V A I C V S S T A K H L D N L Q E M T D S S G H
721 CCCCCCTCCAGAGAACAGTGGCAATTTGTGTGAGCTCCACAGCCAAGCATCTGGACAATCTGCAGGAGATGACCGACTCGTCTGGACA
170 V D T L N L L R A I V V D I S N R L F L G V P L N E K D F L
811 TGTGGACACTCTCAATCTGCTCAGAGCCATAGTGGTGGACATCTCCAACAGGCTTTTCTTGGAGTGCCGCTAAACGAGAAAGACTTTCT
200 T K I Q N Y F D T W Q A V L I K P D I F F K I G W L Y N K H
901 GACGAAAATCCAAAACACTTTGACACCTGGCAAGCAGTTCTAATAAAGCCTGATATATTCTTTAAGATTGGATGGCTGTACAACAAGCA
230 K R A A Q E L Q D A M E S L L E I K R Q V I N E S E K L D D
991 CAAAAGAGCAGCCCAAGAGCTGCAAGATGCGATGGAGAGCCTTCTAGAAATCAAAGACAAGTTATTAATGAATCTGAAAAGCTGGATGA
260 N L D F A T E L I L A Q N H G E L S A D N V R Q C V L E M V
1081 TAATCTTGACTTTGCAACAGAGCTCATCTTGGCCAGAACCCAGGAGAGCTTTCAGCAGATAACGTCAGGCAGTGTGTGCTGGAGATGGT
290 I A A P D T L S I S L F F M L M L L K Q N P D V E L R I V E
1171 GATCGCAGACCTGACACTTTTCCATCAGCCTTTTCTTATGTTGATGTGCTGAAACAAAACCCAGATGTAGAACTGAGGATAGTGGA
320 E M N T V L S E K A V E N I D Y Q V L K V L E I F I N E C L
1261 GGAGATGAACACTGTCTTGAGTGAGAAAGCTGTTGAAAACATTGATTATCAAGTCTTGAAAGTGCTGGAGATTTTCATCAATGAGTGT
350 R F H P V V D F T M R K A L E D D N I E G T K I R K G T N I
1351 GAGATTTCATCCTGTGGTCGATTTCACAATGCGAAAAGCTCTGGAGGATGACAACATCGAAGGCACAAAAATTAGAAAAGGAACCAACAT
380 I L N I G L M H K T E F F P K P K D F N L M N F D K T V P S
1441 CATTCTCAACATTGGTCTCATGCTAAGACTGAGTCTTCCCAAAACAAAAGATTCAACCTGATGAACCTTGACAAAACAGTGCCACAG
410 R F F Q P F G C G P R S C V G K N I A M V M M K A I L V T L
1531 TCGTTTCTTCCAGCCCTTCGGCTGTGGCCTCGTTTCTGTGTGGGCAAAACATCGCCATGGTGATGATGAAGGCCATCTTGGTCACTCT
440 L S R Y T V C P R Q G C T V N N I R Q T N N L S Q Q P V E D
1621 GTTGTCCCGTTACACAGTGTGTCTCGTCAAGGCTGCACTGTCAACAACATCCGGCAGACCAACAACCTGTGCGCAGCAGCCTGTGGAGGA
470 E H S I A M C F I P R T T Q H S Q L *
1711 CGAGCACAGCCTGGCCATGTGCTTCATCCCTCGGACAACACAACACAGTCACTCTGAaacacagggatgctgttacacatcggtgaaa
1801 acgctagtattatataagtgtagttaggcctgctgggctggtataataaatgcttcaaaaaaaaaaaaaaaaaaaaaaaaaaaaaa
```

(d)

```
-1054 actatgaatagaaaaactgctttttttgttcgttttgaatctgttttggtggtttcaaagcaatgttatctggcctgttcagtgttgctg
SOX GATA
-964 tcatgtaattggtactttagtagcccgagtggtcagtggtctaaagcaaccagtatagtgaaggcttaaccaaggatttataaatacgtgagtc
-874 agtgcaatttcttttagttggagaataacgatcatctttacaacaagtgagggaagcgtcgtgttcttctcaaactgcctcctaagctgtc
-784 aggagtagtaacacacagaagcagtaagttatccttttggtaatttggttaaaacaaatttaacttagaatttaattggaagtaaaaaat
-694 ataagataactactaaaatttcagtttcagttttctgtcacttactctcaatcattcatatgtgacatttttatatttctaataatatt
SOX
-604 caggaattcagttttgactcagagtttgcacaaatttttacaaaattctaattgtgggcggcaacaatttgtgctttgcaaaatgatatttc
SOX
-514 agtttttacattgagaaagggatctcttttaaacttgaaattcatacgaacacaccttaatgcagtttcttaaagaagctcattactgtaaa
-424 ttgtcaagggaacattaaactttctcgaccactgtgcacaatttgaaaaatgatgaaaaatctcattgttttttactaaaattaaagt
SOX
-344 ttgatgtgaaacactaatcacacgtcagagcattatgtgggtatatttgttcgtgcaggtgtaagtacaggctggtgtgtgttacatt
CRE
-244 ccagcattgaagagtattatttagcagtaaatagaaaggctgtccacagattaagggttcttctgtgtgtgcttgaatgaatgaatgaatgaa
-154 tgaatgagagggggttgactggtgtactggtgagagacactttatgagcacaagcaagggttcatttacagacagacagcaggagtag
-64 cgagctggctcaggtgtgtgtgtactcggctggtgttataaagggaatcctgtccctggggaagcacaccatcggtcccATGGTGGTGA
TATA Box +1
26 TACAGTCACTGCGATTCTGCTTCT
DMRT
```

### Figure S2

1 10 20 30 40 50 60 70  
 Cyp19a1a MDLIPACERAMTPVGLKAIEADLVSVSLNTTTVESPGISIASTRLLILLVCLLLFAWSHTDKNNVPGPSFC  
 Cyp19a1b .....MVGDTVTAIL.....LLLLLLLLFTTWSRRNRSHIPGPRFL  
 80 90 100 110 120 130 140  
 Cyp19a1a LGLGLPILSYVRFMTWTGIGTASNYYNKKYGDIVRVWINGEETLVISSSSAVHVLKNGQYTCRFGSKQGLS  
 Cyp19a1b AGLGLPILSYARFIWTGIGTASNYYSNKYGSVVRVWINGEETLILSSSSAVHVLRSQAQYTCRFGSKKGL  
 150 160 170 180 190 200  
 Cyp19a1a CIGMNERGIIFNNNVVLWKKIRTYFTKALTGPGLOQTVEVCVSSMQTHLDDKLGSLN...HADVLSLLRC  
 Cyp19a1b CIGMEGRGIIFNSDVPVLWKKVRAYFSKALTGPGLOQRTVAICVSSSTAKHLDNLQEMTDSSGHVDLTNLLRA  
 210 220 230 240 250 260 270  
 Cyp19a1a TVVDISNRLFLGVPVDEKELLMKIQKYFETWQNVLIKPDIIYFKCDWIIQQRHRKTAQELQDAIESLVEQKR  
 Cyp19a1b TVVDISNRLFLGVPVLNEKDFLTKIQNYFETWQAVLIKPDIFFKIGWLYNKHKRAAQELQDAMESLLEIKR  
 280 290 300 310 320 330 340  
 Cyp19a1a REMQQADKLDN.INFTAEELIFAQNHSELSAEDVRQCVLEMVIAAPDTLSSISLYFMLLLKQNPDELQLL  
 Cyp19a1b QVINESEKLDNLDLFATEELILAQNHSELSADNVRQCVLEMVIAAPDTLSSISLYFMLLLKQNPDELRI  
 350 360 370 380 390 400 410  
 Cyp19a1a QEDTIVVGQRQLQNEHLQRLQMLESFINECLRFHPVVDITMRRALSDDIIDGYRVPKGTNIILNTGRMHR  
 Cyp19a1b EEMNTVLSEKAVERNIDYQVLKVLEIFINECLRFHPVVDFTMRKALEDDNIEGTKIRKGTNIILNIGLMHK  
 420 430 440 450 460 470 480  
 Cyp19a1a TEFELKQNEFSELENFEKNTPRRYFQPFQSGPRSCVGVKHIAMVMMKSIILVTLLSRYSVCLHKGILTLDCLPQ  
 Cyp19a1b TEFELPKPKDFNLNMFDKTVPSPRFQPFQSGPRSCVGVKNIAMVMMKSIILVTLLSRYTVCPRQGCTVNNIRQ  
 490 500 510  
 Cyp19a1a TNNLSQOPVEHHQEAELLSMRFLLPRQSGEST Identity  
 Cyp19a1b TNNLSQOPVEDEHS...LAMCFIPRTTOHSOL 57.5%

### Figure S3

1 10 20 30 40 50 60 70 80

CmCyp19a1a .MDLIP.ACERAMPVPVGLKAIADL.VSVSLNTTIVTESPGISIAATR.LTLLV.LLLFAWSHTDKN.VVPG.PS.FC.LGLGPILSYVRFIWMIGT  
 McCyp19a1a .MDLIP.ACERAMPVPVGLDAAADL.DVSSNNTAVGSAAGISVIAATR.ALMLLV.LLLVWNHTEKK.VVPG.PS.FC.LGLGPILSYVRFIWMIGT  
 LcCyp19a1a .MDLIS.ACERAMPNPVGLDAMVTEL.VSPMPNATAVGSVPGISIAATR.LTLLV.LLLVWASHTDKK.VVPG.PS.FC.LGLGPILSYVRFIWMIGT  
 OcCyp19a1a .MDLIS.ACEQAMPNPVGLDAMVARS.LCDLCKHPIDG..ISMAATR.LTLLV.LLLVWASHTDKK.VVPG.PS.FC.LGLGPILSYVRFIWMIGT  
 OlCyp19a1a .MDLIP.ACDRMTSSS...CLVLAEL.VSIAPNTTVGLSPGIPMAATR.SLTLLV.LLLVWWSHSEKK.TVPG.PS.FC.LGLGPILSYVRFIWMIGT  
 TrCyp19a1a .MDLI...CDWAMAAGVLADEVL...VSVSPNATEASPSSGSAATR.ALITLL.LLLVWWSHTEKK.VVPG.PS.FC.LGLGPILSYVRFIWMIGT  
 SsCyp19a1a .MDLLSPVCGRAMEAVCLDTV.IADLLVSELNRNATASQGVNLCATG.SLIMLL.LLLLAWRHTDKN.VVPG.PF.FC.LGVGPILSYVRFIWMIGT  
 CaCyp19a1a .MKQVHLGEAVLELLMGQAHNSSYGAGDNVSGAMAT.LL.LLL.LLLLAIRHHWTEKDHVPG.PF.FC.LGLGPILSYVRFIWMIGT  
 CcCyp19a1a MAGELLPCPG..MKPVLHSEAPLDLLMGQAHNSYGAGDNVSGAMAT.LL.LLL.LLLLAIRHHWTEKDHVPG.PF.FC.LGLGPILSYVRFIWMIGT  
 DrCyp19a1a MAGDLLQPCG..MKPVLHSEAPLDLLRGHANTGTGAGDNACGATAT.LL.LLL.LLLLAIRHHWTEKDHVPG.PF.FC.LGLGPILSYVRFIWMIGT  
 IpCyp19a1a MAAHVFPMCERTKRPVHFSEITVMEILLREARNGTDPRYENPRGIT.L.LLL.LLLVLLVWNHREKKCSIPG.PS.FC.LGLGPILSYVRFIWMIGT  
 HfCyp19a1a MAAHIANKCECRKPLFSEQVMEILLREHRNGTNPQENPTGIT..LL.LLL.LLLVLLVWNHREKKCSIPG.PS.FC.LGLGPILSYVRFIWMIGT  
 OlCyp19a1b MIQOEOTLDE...LFHS.VSQVITFL.LL.LLL.LLLFINTWRQSHLSIPG.PF.FC.LGLGPILSYVRFIWMIGT  
 OcCyp19a1b MLPVEELTAGP...MVADRASEVTAIVLL.LL.LLL.LLLFINTWRQSHLSIPG.PF.FC.LGLGPILSYVRFIWMIGT  
 CmCyp19a1b MYGDTVT..AILLL.LLL.LLLFINTWRQSHLSIPG.PF.FC.LGLGPILSYVRFIWMIGT  
 McCyp19a1b MKRMLPLETLTISP...MVDDTISP.LL.LLL.LLLFINTWRQSHLSIPG.PF.FC.LGLGPILSYVRFIWMIGT  
 LcCyp19a1b MLVIFKTSRGSTGFLKLHNSLSGVGKIDTR.PF.FC.LGLGPILSYVRFIWMIGT  
 TrCyp19a1b MKPKETLNLITASGPTPLPLPLMMMLLMMMLLFTWNRQSHVPG.PF.FC.LGLGPILSYVRFIWMIGT  
 SsCyp19a1b MATS...IVDDTSMSEALL.LL.LLL.LLLITWCLNTSHIPG.PF.FC.LGLGPILSYVRFIWMIGT  
 CaCyp19a1b MEEVLKGTVNFAA...TVQVTLMALTGT.LL.LLL.LLLHRIFTAKNWRNQSIPG.PG.WLGLGPIMSYVRFIWMIGT  
 CcCyp19a1b MMEQVVKGPVNIAA...AVQVTLMALTGT.LL.LLL.LLLHRIFTAKNWRNQSIPG.PG.WLGLGPIMSYVRFIWMIGT  
 DrCyp19a1b MMEHVVKDANVIGA...VVGQTLTLTGT.LL.LLL.LLLHRIFTAKNWRNQSIPG.PG.WLGLGPIMSYVRFIWMIGT  
 IpCyp19a1b MELQNVSDVMA...VMEGRGLCVISALFL.LL.LLL.LLLTAYNRRNKSLTPG.PY.WLGLGPILSYVRFIWMIGT  
 HfCyp19a1b MELQNVSDVMA...ALDATGFKVGSALLFL.LL.LLL.LLLTAYNRRNKSLTPG.PY.WLGLGPILSYVRFIWMIGT  
 AbCyp19a1 MKQVLEERISKMLVPVHHNITDIVPEMSSGTTA..ILSL.LL.LLLVWLNCKAKASIPG.PF.FC.MGIGIALLSYVRFIWMIGT  
 LoCyp19a1 MKQVPLDNVVMKMQNPVSHNITDIVPEMSSGATA..IL.LL.LL.LLLVWLNCKAKASIPG.PF.FC.MGIGIALLSYVRFIWMIGT  
 BtCyp19a1 MVLEMLNPIHYNITSVPEAMPAATMPV.LL.LL.LLLVWLNCKAKASIPG.PF.FC.MGIGIALLSYVRFIWMIGT  
 HsCyp19a1 MLLEVLNPIHYNITSVPEAMPAATMPV.LL.LL.LLLVWLNCKAKASIPG.PF.FC.MGIGIALLSYVRFIWMIGT  
 MmCyp19a1 MFLEMLNPIHYNITSVPEAMPAATMPV.LL.LL.LLLVWLNCKAKASIPG.PF.FC.MGIGIALLSYVRFIWMIGT  
 GgCyp19a1 MIPETLNLPLNY.FTSLVPDLMPVATVPV.II.LL.LL.LLLVWLNCKAKASIPG.PF.FC.MGIGIALLSYVRFIWMIGT  
 NmCyp19a1 MVLETLNLMHYNITSVPEAMPAATMPV.LL.LL.LLLVWLNCKAKASIPG.PF.FC.MGIGIALLSYVRFIWMIGT  
 ShCyp19a1 MVLETLNLMHYNITSVPEAMPAATMPV.LL.LL.LLLVWLNCKAKASIPG.PF.FC.MGIGIALLSYVRFIWMIGT  
 XtCyp19a1 MEALNPVQYNSTEAPVTLATP.LL.LL.LL.LLLVWLNCKAKASIPG.PF.FC.MGIGIALLSYVRFIWMIGT  
 XlCyp19a1 MEALNPVQYNSTEAPVTLATP.LL.LL.LL.LLLVWLNCKAKASIPG.PF.FC.MGIGIALLSYVRFIWMIGT  
 CcCyp19a1 MRQFSLGDMVLQMSKAAQNLTITGVPEMSSGATVP.LL.LL.LL.LLLVWLNCKAKASIPG.PF.FC.MGIGIALLSYVRFIWMIGT  
 HsaCyp19a1 MEMKEFAPDNKLQMSKAAQNLTITGVPEMSSGATVP.LL.LL.LL.LLLVWLNCKAKASIPG.PF.FC.MGIGIALLSYVRFIWMIGT  
 CmCyp19a1

90 100 110 120 130 140 150 160 170 180

CmCyp19a1a ASNYYN.NK.YGDI.VR.VWINGEET.LL.VISRSSAVHVLKNGHYV.SRFSGKQGLSCIGMNER.GIIFNNNVVLWKKIRTYFTKATGPGLOQTVEVCVS  
 McCyp19a1a ASNYYN.NK.YGDI.VR.VWINGEET.LL.VISRSSAVHVLKNGHYV.SRFSGKQGLSCIGMNER.GIIFNNNVVLWKKIRTYFTKATGPGLOQTVEVCVS  
 LcCyp19a1a ASNYYN.NK.YGDI.VR.VWINGEET.LL.VISRSSAVHVLKNGHYV.SRFSGKQGLSCIGMNER.GIIFNNNVVLWKKIRTYFTKATGPGLOQTVEVCVS  
 OcCyp19a1a ASNYYN.NK.YGDI.VR.VWINGEET.LL.VISRSSAVHVLKNGHYV.SRFSGKQGLSCIGMNER.GIIFNNNVVLWKKIRTYFTKATGPGLOQTVEVCVS  
 OlCyp19a1a ASNYYN.NK.YGDI.VR.VWINGEET.LL.VISRSSAVHVLKNGHYV.SRFSGKQGLSCIGMNER.GIIFNNNVVLWKKIRTYFTKATGPGLOQTVEVCVS  
 TrCyp19a1a ASNYYN.NK.YGDI.VR.VWINGEET.LL.VISRSSAVHVLKNGHYV.SRFSGKQGLSCIGMNER.GIIFNNNVVLWKKIRTYFTKATGPGLOQTVEVCVS  
 SsCyp19a1a ASNYYN.NK.YGDI.VR.VWINGEET.LL.VISRSSAVHVLKNGHYV.SRFSGKQGLSCIGMNER.GIIFNNNVVLWKKIRTYFTKATGPGLOQTVEVCVS  
 CaCyp19a1a ASNYYN.NK.YGDI.VR.VWINGEET.LL.VISRSSAVHVLKNGHYV.SRFSGKQGLSCIGMNER.GIIFNNNVVLWKKIRTYFTKATGPGLOQTVEVCVS  
 CcCyp19a1a ASNYYN.NK.YGDI.VR.VWINGEET.LL.VISRSSAVHVLKNGHYV.SRFSGKQGLSCIGMNER.GIIFNNNVVLWKKIRTYFTKATGPGLOQTVEVCVS  
 DrCyp19a1a ASNYYN.NK.YGDI.VR.VWINGEET.LL.VISRSSAVHVLKNGHYV.SRFSGKQGLSCIGMNER.GIIFNNNVVLWKKIRTYFTKATGPGLOQTVEVCVS  
 IpCyp19a1a ASNYYN.NK.YGDI.VR.VWINGEET.LL.VISRSSAVHVLKNGHYV.SRFSGKQGLSCIGMNER.GIIFNNNVVLWKKIRTYFTKATGPGLOQTVEVCVS  
 HfCyp19a1a ASNYYN.NK.YGDI.VR.VWINGEET.LL.VISRSSAVHVLKNGHYV.SRFSGKQGLSCIGMNER.GIIFNNNVVLWKKIRTYFTKATGPGLOQTVEVCVS  
 OlCyp19a1b ASNYYN.NK.YGDI.VR.VWINGEET.LL.VISRSSAVHVLKNGHYV.SRFSGKQGLSCIGMNER.GIIFNNNVVLWKKIRTYFTKATGPGLOQTVEVCVS  
 CmCyp19a1b ASNYYN.NK.YGDI.VR.VWINGEET.LL.VISRSSAVHVLKNGHYV.SRFSGKQGLSCIGMNER.GIIFNNNVVLWKKIRTYFTKATGPGLOQTVEVCVS  
 LcCyp19a1b ASNYYN.NK.YGDI.VR.VWINGEET.LL.VISRSSAVHVLKNGHYV.SRFSGKQGLSCIGMNER.GIIFNNNVVLWKKIRTYFTKATGPGLOQTVEVCVS  
 SsCyp19a1b ASNYYN.NK.YGDI.VR.VWINGEET.LL.VISRSSAVHVLKNGHYV.SRFSGKQGLSCIGMNER.GIIFNNNVVLWKKIRTYFTKATGPGLOQTVEVCVS  
 TrCyp19a1b ASNYYN.NK.YGDI.VR.VWINGEET.LL.VISRSSAVHVLKNGHYV.SRFSGKQGLSCIGMNER.GIIFNNNVVLWKKIRTYFTKATGPGLOQTVEVCVS  
 CaCyp19a1b ASNYYN.NK.YGDI.VR.VWINGEET.LL.VISRSSAVHVLKNGHYV.SRFSGKQGLSCIGMNER.GIIFNNNVVLWKKIRTYFTKATGPGLOQTVEVCVS  
 CcCyp19a1b ASNYYN.NK.YGDI.VR.VWINGEET.LL.VISRSSAVHVLKNGHYV.SRFSGKQGLSCIGMNER.GIIFNNNVVLWKKIRTYFTKATGPGLOQTVEVCVS  
 DrCyp19a1b ASNYYN.NK.YGDI.VR.VWINGEET.LL.VISRSSAVHVLKNGHYV.SRFSGKQGLSCIGMNER.GIIFNNNVVLWKKIRTYFTKATGPGLOQTVEVCVS  
 IpCyp19a1b ASNYYN.NK.YGDI.VR.VWINGEET.LL.VISRSSAVHVLKNGHYV.SRFSGKQGLSCIGMNER.GIIFNNNVVLWKKIRTYFTKATGPGLOQTVEVCVS  
 HfCyp19a1b ASNYYN.NK.YGDI.VR.VWINGEET.LL.VISRSSAVHVLKNGHYV.SRFSGKQGLSCIGMNER.GIIFNNNVVLWKKIRTYFTKATGPGLOQTVEVCVS  
 OlCyp19a1b ASNYYN.NK.YGDI.VR.VWINGEET.LL.VISRSSAVHVLKNGHYV.SRFSGKQGLSCIGMNER.GIIFNNNVVLWKKIRTYFTKATGPGLOQTVEVCVS  
 CmCyp19a1b ASNYYN.NK.YGDI.VR.VWINGEET.LL.VISRSSAVHVLKNGHYV.SRFSGKQGLSCIGMNER.GIIFNNNVVLWKKIRTYFTKATGPGLOQTVEVCVS  
 LcCyp19a1b ASNYYN.NK.YGDI.VR.VWINGEET.LL.VISRSSAVHVLKNGHYV.SRFSGKQGLSCIGMNER.GIIFNNNVVLWKKIRTYFTKATGPGLOQTVEVCVS  
 SsCyp19a1b ASNYYN.NK.YGDI.VR.VWINGEET.LL.VISRSSAVHVLKNGHYV.SRFSGKQGLSCIGMNER.GIIFNNNVVLWKKIRTYFTKATGPGLOQTVEVCVS  
 TrCyp



Figure S4

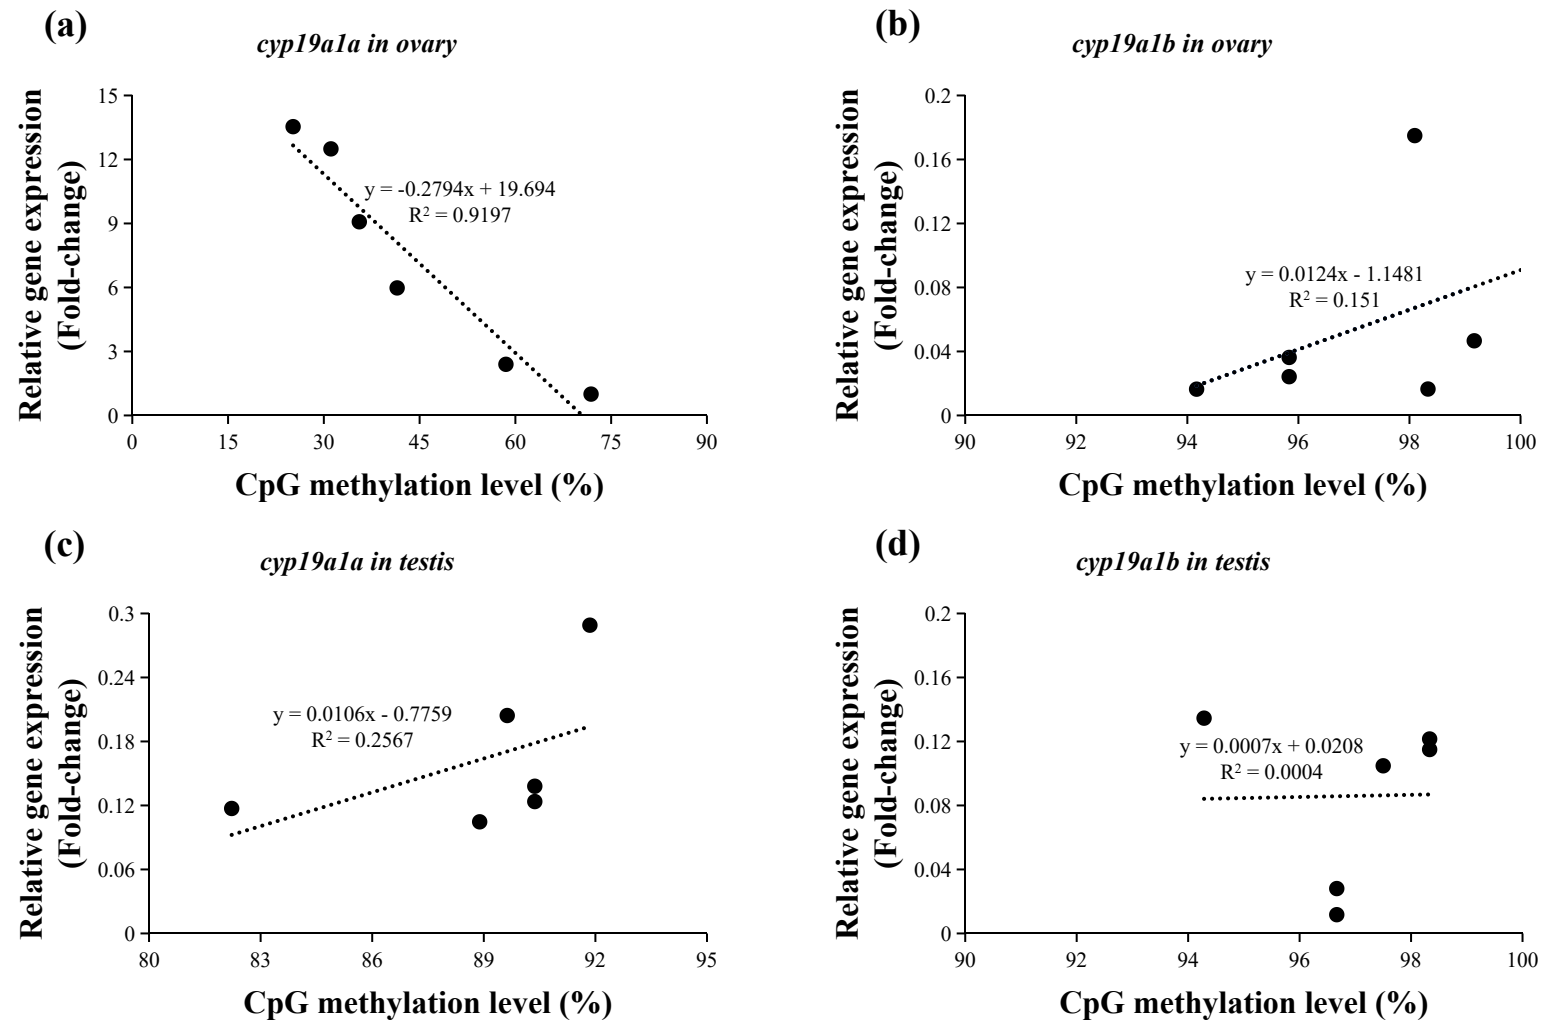

Supplement: s1 [file s1]
